# Supplementary material for: Myocardial infarction creates a critical time window for AAV-based cardiac gene transfer
Source: Research Square preprint supplement (doi:10.21203/rs.3.rs-5291943/v1), 2024-11-05
Supplement: Supplementary file 1 [file 2a5ced418a0b03c893c24864.xlsx]

## Sheet: figure 1B 
Sham	MI
77444.5	427924
74704.5	592624
35604.5	801924
20384.5	537524
126148	455852
210148	1823853
315148	1673853
103148

## Sheet: figure 1C
Sham	MI
1.0884	2.23897
1.12535	1.99898
0.786256	1.67417

## Sheet: figure 1D 
	AAV DNA FC				AAV mRNA FC				mRNA/DNA
	Sham	MI			Sham	MI			Sham	MI
	1.11342	4.90754			1.51872	2.32871			1.44143	0.501446
	0.989657	3.84149			0.76288	6.67859			0.814602	1.83719
	1.12117	4.65355			0.644483	14.1842			0.607448	0.60186
	0.809442	2.98625			1.07391	6.13135			1.40201	0.405423

## Sheet: figure 1E
heart			liver			Sk.Mus
Sham	MI		Sham	MI		Sham	MI
1.1302	1.81872		1.24968	0.853608		1.67164	1.55224
1.13611	3.52879		1.23526	0.859599		0.616915	1.05473
0.669619	6.19427		0.623287	1.62245		0.716418	1.11443
1.06407	2.62533		0.891773	1.40278		0.995025	2.36816
	1.74077			1.13408			2.16915

## Sheet: figure 1F
	Sham									MI
AAV2	0.0682103	0.0645308	0.0887649	0.0494736						0.0971349	0.193821	0.0480096	0.108027
AAV1	0.102673	0.0726011	0.066192	0.0606282						0.182521	0.205822	0.276011	0.270956
AAV6	0.0582853	0.0847452	0.0586907	0.119848						0.289027	0.528244	0.463061	0.271547
AAV9	0.202052	0.176711	0.296506	0.252228	0.121521	0.210119	0.124074	0.114172		1.23354	0.747148	0.85232	1.167	1.21358	1.4432	0.999498	0.343713

## Sheet: figure 2A
AAV DNA FC
Sham	1	3	5	7
0.692	2.8035	5.2618	0.8325	2.0713
1.541	3.8831	5.8316	3.0572	1.4714
0.9377	3.4755	5.549	3.4755	1.7178

## Sheet: figure 2B
AAV mRNA FC
sham	1	3	5	7
0.428952	1.00386	6.21414	0.560799	0.936633
1.62701	3.15773	10.4268	6.38885	4.5176
1.43285	4.55428	4.8981	5.9817	1.07591

## Sheet: figure 2C
AAV protein FC
sham	1	3	5	7
1.32031	1.81966	2.55381	1.73989	0.905822
1.42948	2.45411	1.67354	0.934841	0.992389
0.250215	0.800212	2.52633	0.681391	0.380471

## Sheet: figure 2D
AAV DNA FC
Sham	D1	D3	D5
1.26942	1.78695	1.61049	1.49917
1.05275	0.933572	0.984525	1.82872
1.01455	1.45481	1.73007	1.17623
0.737561	1.10254	2.22042	2.37979

## Sheet: figure 2E
FI(a.u.)
Sham	DZ	MZ
6346.88	6883.24	10120.8
2566.22	6754.72	13090.9
2547.92	6960.18	12331.1
4993.79	7466.66	9650.12
5662.17	6567.12	7575.57
4864.43	8004.02	11838.1
	5193.01	7207.38
	6302.08	10331
	3758.1	11718.9

[truncated: 14 more sheets: figure 3A, figure 3B, figure 3D, figure 3E, figure 3G, figure 3H, figure 3J, figure 4C, figure 4D, figure 4F, figure 4G, figure 4H, figure 4J, figure 4k]
